# Supplementary material for: Multicentre Observational Study of Treatment Satisfaction with Cladribine Tablets in the Management of Relapsing Multiple Sclerosis in the Arabian Gulf: The CLUE Study
Source: PubMed Central journal article supplement — Neurol Ther. 2023 Jun 8;12(4):1309–18. doi: 10.1007/s40120-023-00497-2 (PMC10310633; doi:10.1007/s40120-023-00497-2), 2023-06-08
Supplement: 40120_2023_497_MOESM1_ESM.pdf [file 40120_2023_497_MOESM1_ESM.pdf]

# **Prospective, multicentre observational study of treatment satisfaction with cladribine tablets in the management of relapsing multiple sclerosis in the Arabian Gulf**

**Jihad Inshasi,<sup>1</sup> Samar Farouk,<sup>2</sup> Ahmed Shatila,<sup>3</sup> Ali Hassan,<sup>4</sup> Miklos Szolics,<sup>4</sup> Mona Thakre,<sup>5</sup> Derk Krieger,<sup>6</sup> Taoufik Alsaadi,<sup>7</sup> Abubaker Almadani,<sup>8</sup> Victoria Mifsud,<sup>9</sup> Anu Jacob,<sup>9</sup> Amir Boshra,<sup>10</sup> Raed Alroughani<sup>11</sup>**

1. Rashid Hospital and Dubai Medical College and Dubai Health Authority (DHA); 2. Ibn Sina Hospital, Kuwait, and Minia University, Egypt; 3. Sheikh Shakhbout Medical City, Abu Dhabi, UAE; 4. Tawam Hospital, Abu Dhabi, UAE; 5. Al Zahra Hospital, Dubai, UAE; 6. Mediclinic Hospital, Dubai, UAE; 7. American Center for Psychiatry and Neurology, Dubai, UAE; 8. Rashid Hospital, Dubai, UAE; 9. Tawam Hospital, Abu Dhabi, UAE; 10. Merck Serono Middle East FZ Ltd, Dubai, UAE an affiliate of Merck KGaA Darmstadt Germany; 11. Department of Medicine, Amiri Hospital, Sharq, Kuwait.

## **Online supplementary (OS) material**

**OS Figure 1.** Treatment Satisfaction Questionnaire for Medication (TSQM) scores for convenience according to subject characteristics at baseline.

**OS Figure 2.** TSQM scores for side-effects according to subject characteristics at baseline.

**OS Figure 3.** TSQM scores for effectiveness according to subject characteristics at baseline.

**OS Table 1.** List of Independent Ethics Committees or Institutional Review Boards that approved the study protocol at each study site

OS Figure 1. TSQM scores for convenience according to subject characteristics at baseline.

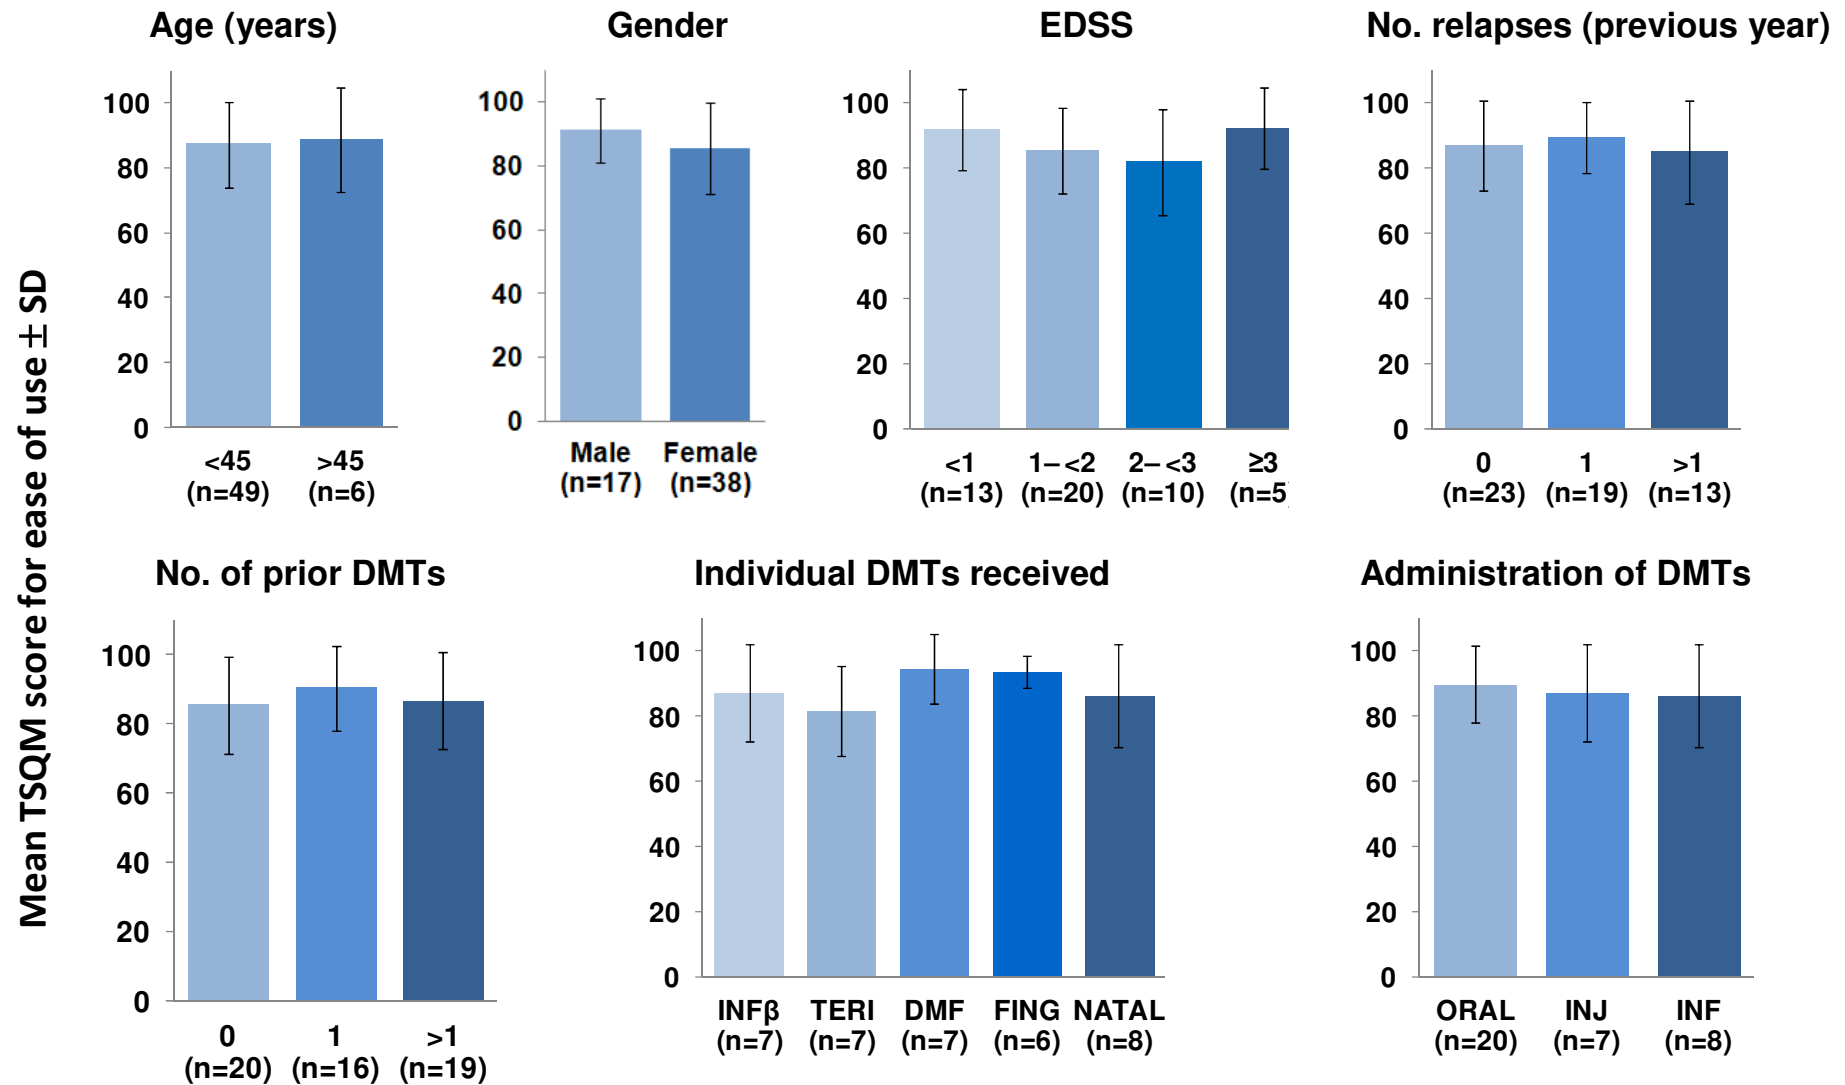

DMT: disease-modifying therapy; EDSS: expanded disability status scale; INFβ: interferonβ; TERI: teriflunomide; DMF: dimethyl fumarate; FING: fingolimod; NATAL: natalizumab; INJ: injectable; INF: infusional. Derived from the Full Analysis Set (n=55). Higher TSQM scores indicate better patient satisfaction with treatment.

OS Figure 2. TSQM scores for side-effects according to subject characteristics at baseline.

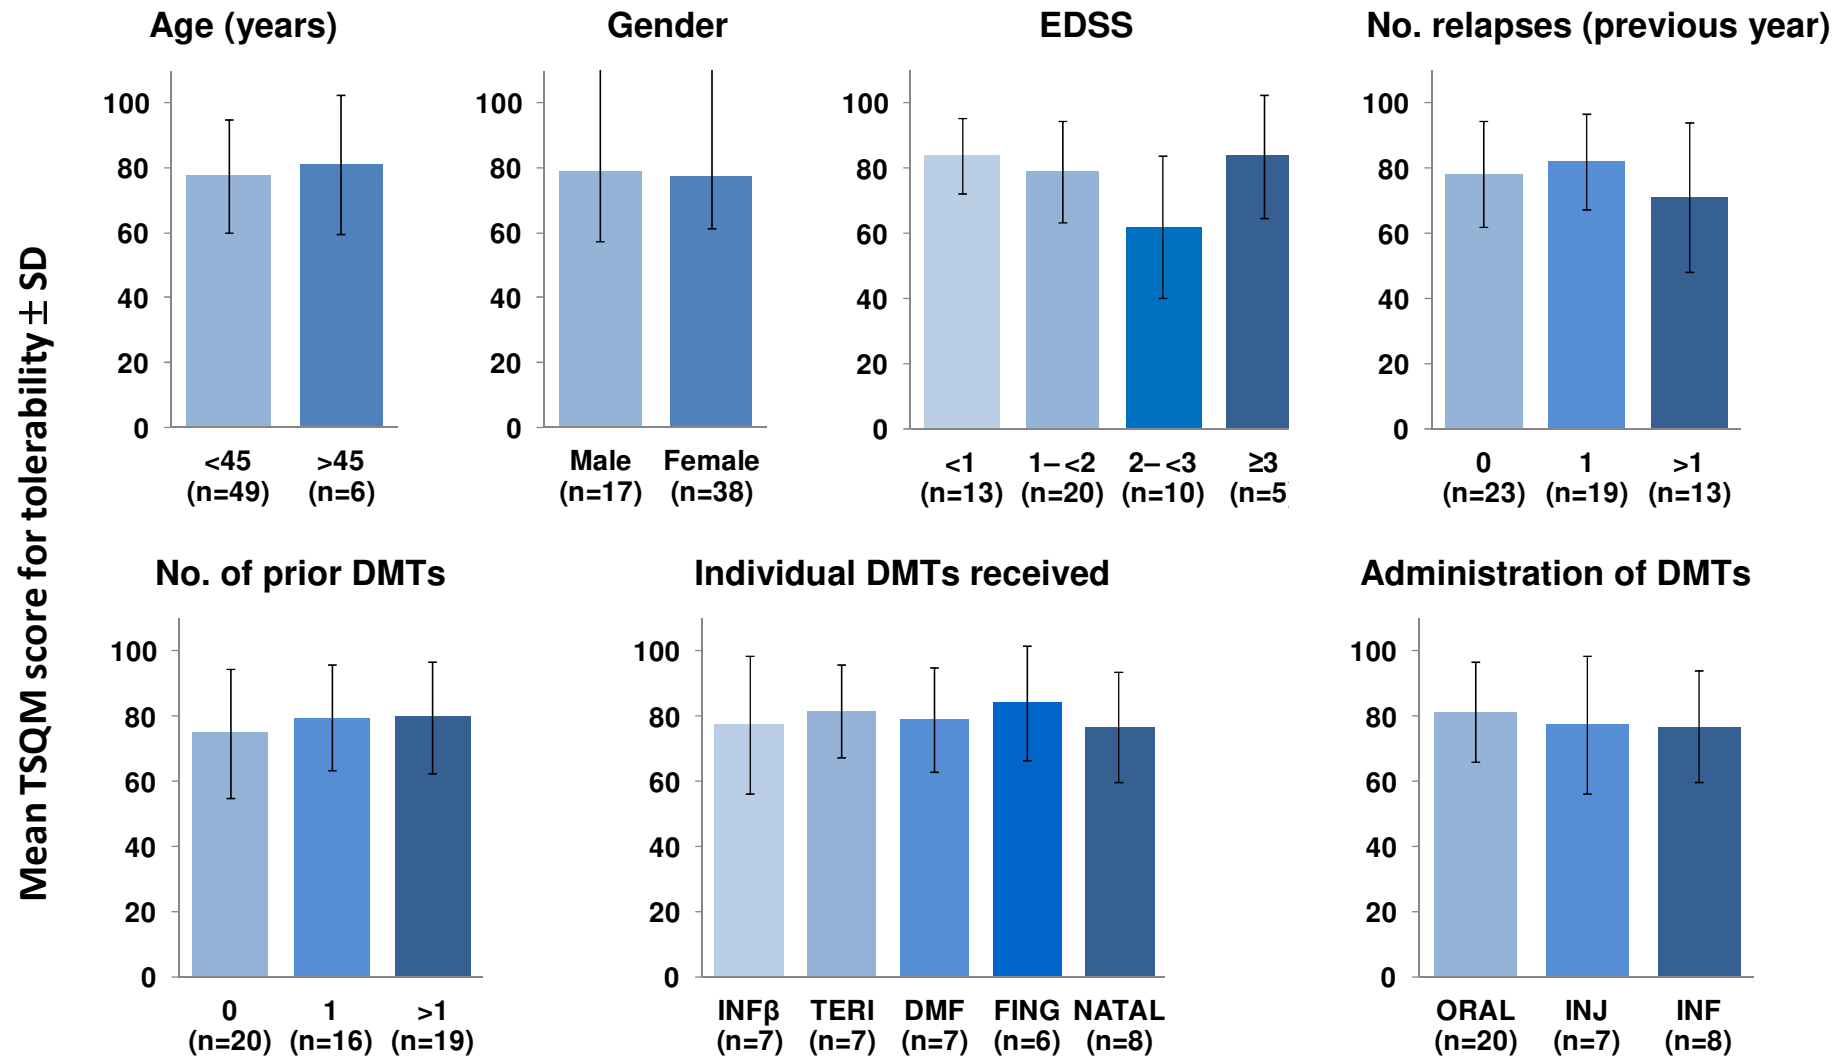

DMT: disease-modifying therapy; EDSS: expanded disability status scale; INFβ: interferonβ; TERI: teriflunomide; DMF: dimethyl fumarate; FING: fingolimod; NATAL: natalizumab; INJ: injectable; INF: infusional. Derived from the Full Analysis Set (n=55). Higher TSQM scores indicate better patient satisfaction with treatment.

OS Figure 3. TSQM scores for effectiveness according to subject characteristics at baseline.

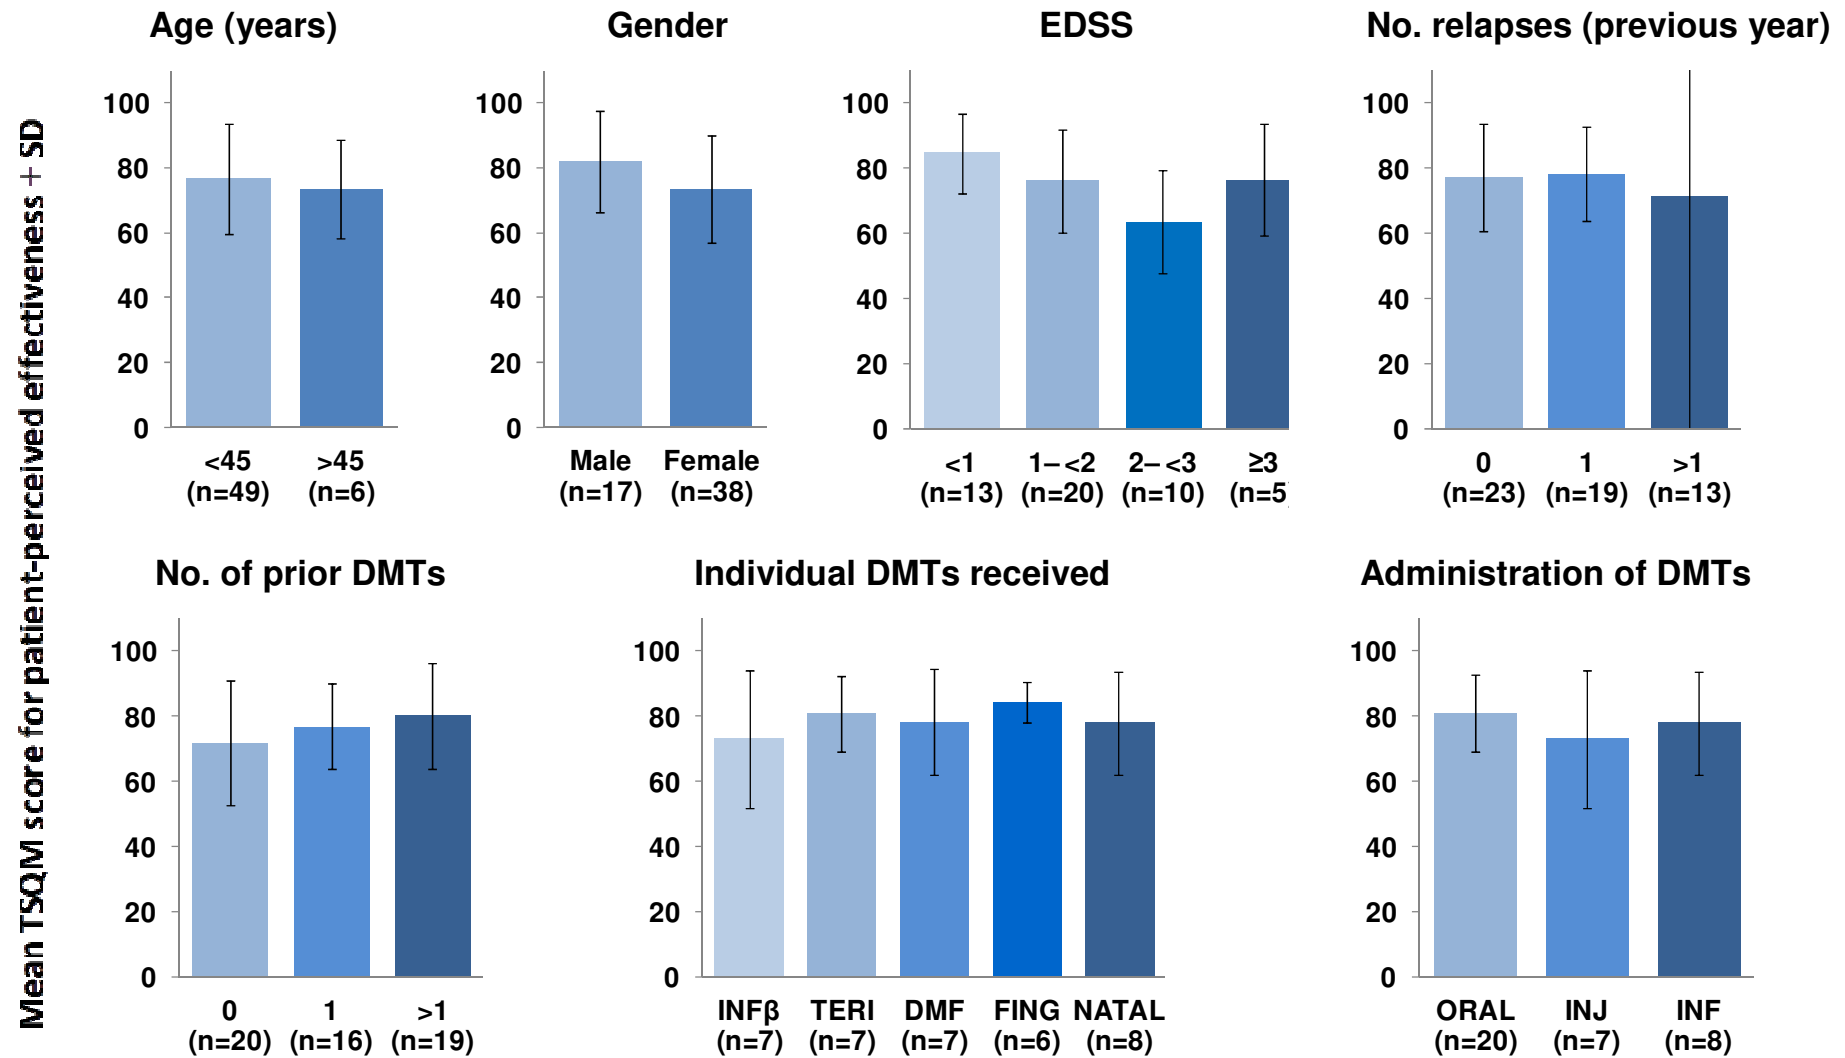

DMT: disease-modifying therapy; EDSS: expanded disability status scale; INFβ: interferonβ; TERI: teriflunomide; DMF: dimethyl fumarate; FING: fingolimod; NATAL: natalizumab; INJ: injectable; INF: infusional. Derived from the Full Analysis Set (n=55). Higher TSQM scores indicate better patient satisfaction with treatment.

**OS Table 1.** List of Independent Ethics Committees or Institutional Review Boards that approved the study protocol at each study site.

|                  |                                                                                                                                                                                                                                                                                                                                                                                                                                                                                                                                                                                                                                                                                                                         |
|------------------|-------------------------------------------------------------------------------------------------------------------------------------------------------------------------------------------------------------------------------------------------------------------------------------------------------------------------------------------------------------------------------------------------------------------------------------------------------------------------------------------------------------------------------------------------------------------------------------------------------------------------------------------------------------------------------------------------------------------------|
| <b>Dubai</b>     | <p>Dubai Health Authority – Headquarters<br/>(Dubai Scientific Research Ethics Committee (DSREC))<br/>Dubai Health Authority Building,<br/>Al Maktoum Bridge Street,<br/>Bur Dubai Area 4545, UAE</p> <p>DHCA Head Office – (DHCA-Regulatory)<br/>Mohammed Bin Rashid Academic Medical Centre (Building No. 14)<br/>Right Wing -Second Floor<br/>Dubai Healthcare City<br/>Dubai, UAE</p> <p>American Center for Psychiatry and Neurology<br/>Sunset Mall – Jumeirah Beach Rd office 39 - 43 – 2nd Floor<br/>Dubai, UAE</p> <p>LEC - Mediclinic Middle East Corporate Office – MCME Research and Ethics<br/>Committee (REC)<br/>PO Box 123812, Dubai, UAE Publishing Pavilion, Floors 5-7 Dubai<br/>Production City</p> |
| <b>Abu Dhabi</b> | <p>Cleveland Clinic Abu Dhabi Research Ethics Committee (REC)<br/>Office of Clinical Research<br/>Cleveland Clinic Abu Dhabi<br/>PO Box 112412</p> <p>SSMC Ethic Research Committee<br/>Sheikh Shakhbout Medical City<br/>Ghweifat International Highway, Al Mafraq area<br/>Abu Dhabi</p> <p>Department of Health Abu Dhabi<br/>(Abu Dhabi Health Research and Technology Committee)<br/>Head Office<br/>Building 35 Kanadel Street, Al Rawda<br/>Abu Dhabi - Postal code 20224</p>                                                                                                                                                                                                                                    |
| <b>Kuwait</b>    | <p>Kuwait Ministry of Health<br/>Ministry of Health Building<br/>Jamal Abdunnasser Street,<br/>Al Solaibeykhat Area, 5,<br/>Kuwait City, Kuwait</p>                                                                                                                                                                                                                                                                                                                                                                                                                                                                                                                                                                     |
